# Supplementary material
Source: PubMed Central journal article supplement (PMC4746703)

# Towards Structural Correctness: Aquatolide and the Importance of 1D Proton NMR FID Archiving

Guido F. Pauli,<sup>\*,†</sup> Matthias Niemitz,<sup>‡</sup> Jonathan Bisson,<sup>†</sup> Michael W. Lodewyk,<sup>§</sup> Cristian Soldi,<sup>⊥,||</sup> Jared T. Shaw,<sup>⊥</sup> and Dean J. Tantillo,<sup>⊥</sup> Jordy M. Saya,<sup>∇</sup> Klaas Vos,<sup>∇</sup> Roel A. Kleinnijenhuis,<sup>∇</sup> Henk Hiemstra,<sup>∇</sup> Shao-Nong Chen,<sup>†</sup> James B. McAlpine,<sup>†</sup> David C. Lankin,<sup>†</sup> and J. Brent Friesen<sup>O</sup>

<sup>†</sup> Department of Medicinal Chemistry & Pharmacognosy and Institute for Tuberculosis Research, College of Pharmacy, University of Illinois at Chicago, 833 South Wood Street, Chicago, Illinois 60612, United States

<sup>‡</sup> PERCH Solutions Ltd., Puijonkatu 24B5, 70110 Kuopio, Finland

<sup>§</sup> Physical Science Department, <sup>Butte</sup> College, Oroville, <sup>California</sup> 95965, United States

<sup>⊥</sup> Dept. of Chemistry, University of California-Davis, One Shields Avenue, Davis, California 95616, United States

<sup>||</sup> Univ. Fed. de Santa Catarina, Campus de Curitibanos, Rod. Ulysses Gaboardi, Km 3, Curitibanos - SC, 89520-000, Brazil

<sup>∇</sup> Van't Hoff Institute for Molecular Sciences, University of Amsterdam, Science Park 904, 1098 XH Amsterdam, The Netherlands

<sup>O</sup>Physical Sciences Department, Rosary College of Arts and Sciences, Dominican University, 7900 West Division Street, River Forest, Illinois 60305, United States

## ■ Supporting Information

| <b>TABLE OF CONTENTS</b> |                                                                                                                           | page |
|--------------------------|---------------------------------------------------------------------------------------------------------------------------|------|
| <b>S1</b>                | Predicted coupling constants for the revised structure of aquatolide, <b>1b</b> , displayed on a <i>J-correlation</i> map | S-3  |
| <b>S2</b>                | NMR Data (800 MHz) Isolated Aquatolide (1b) from Lodewyk et al. JACS 2012.                                                | S-4  |
| <b>S3</b>                | NMR Data Synthetic Aquatolide Using the Sample from Saya et al. Orgl. Lett. 2015                                          | S-5  |

**S1. Predicted coupling constants for the revised structure of aquatolide, 1b, displayed on a *J*-correlation map.**

This figure was adapted from the data from page S29 of Lodewyk, M. W.; Soldi, C.; Jones, P. B.; Olmstead, M. M.; Rita, J.; Shaw, J. T.; Tantillo, D. J. *J. Amer. Chem. Soc.* **2012**, *134*, 18550-18553.

| $\delta$ | H-# | 1       | 2       | 4a       | 4b      | 5a       | 5b      | 6       | 9       | 10      | 13     | 14     | 15 |
|----------|-----|---------|---------|----------|---------|----------|---------|---------|---------|---------|--------|--------|----|
| 4.48     | 1   |         | 3       | 5        | 5       | 6        | 6       | 7       | 4       | 4       | 7      | 4      | 4  |
| 3.25     | 2   | 2.3254  |         | 4        | 4       | 5        | 5       | 6       | 3       | 4       | 6      | 5      | 5  |
| 2.50     | 4a  | 0.4581  | -0.3956 |          | 2       | 3        | 3       | 4       | 5       | 4       | 6      | 6      | 6  |
| 2.02     | 4b  | -0.0273 | -0.0673 | -15.7261 |         | 3        | 3       | 4       | 5       | 4       | 6      | 6      | 6  |
| 2.38     | 5a  | 0.0223  | 0.0021  | 1.8121   | 11.6851 |          | 2       | 3       | 6       | 5       | 5a     | 7      | 7  |
| 2.07     | 5b  | 0.0044  | -0.0280 | 6.7326   | 13.0129 | -20.9269 |         | 3       | 6       | 5       | 5a     | 7      | 7  |
| 5.84     | 6   | -0.0077 | 0.1760  | 0.9081   | -0.2494 | 3.4453   | 5.3638  |         | 5       | 6       | 4a     | 8      | 8  |
| 2.92     | 9   | 0.0670  | -0.1190 | -0.5521  | -0.3150 | -0.4070  | -0.2731 | -0.0002 |         | 3       | 5      | 5      | 5  |
| 2.64     | 10  | 1.8327  | 6.7667  | -0.0503  | -0.2801 | -0.0022  | -0.0575 | 0.0056  | 0.0735  |         | 6      | 4      | 4  |
| 1.86     | 13  | -0.0021 | 0.0277  | 0.0115   | -0.0185 | 2.8324   | 2.5084  | 1.8150  | 0.1372  | 0.0116  |        | 8      | 8  |
| 1.04     | 14  | -0.0677 | 0.0898  | 0.0217   | 0.0477  | -0.0051  | 0.0042  | 0.0021  | -0.3778 | -0.1962 | 0.0000 |        | 4  |
| 1.18     | 15  | -0.1491 | 0.3876  | 0.0050   | 0.0016  | 0.0059   | -0.0051 | 0.0047  | 0.0533  | -0.1232 | 0.0000 | 0.5341 |    |

**S2. NMR Data (800 MHz) Isolated Aquatolide (1b) from Lodewyk et al. JACS 2012.**  $^1\text{H}$  NMR spectrum (Lorentzian-Gaussian window function with LB=(-)1.0 Hz and GF=0.10 Hz).

**Raw NMR data:**  $^1\text{H}$  NMR FID (800 MHz), HiFSA PMS file: included in separate ZIP file.

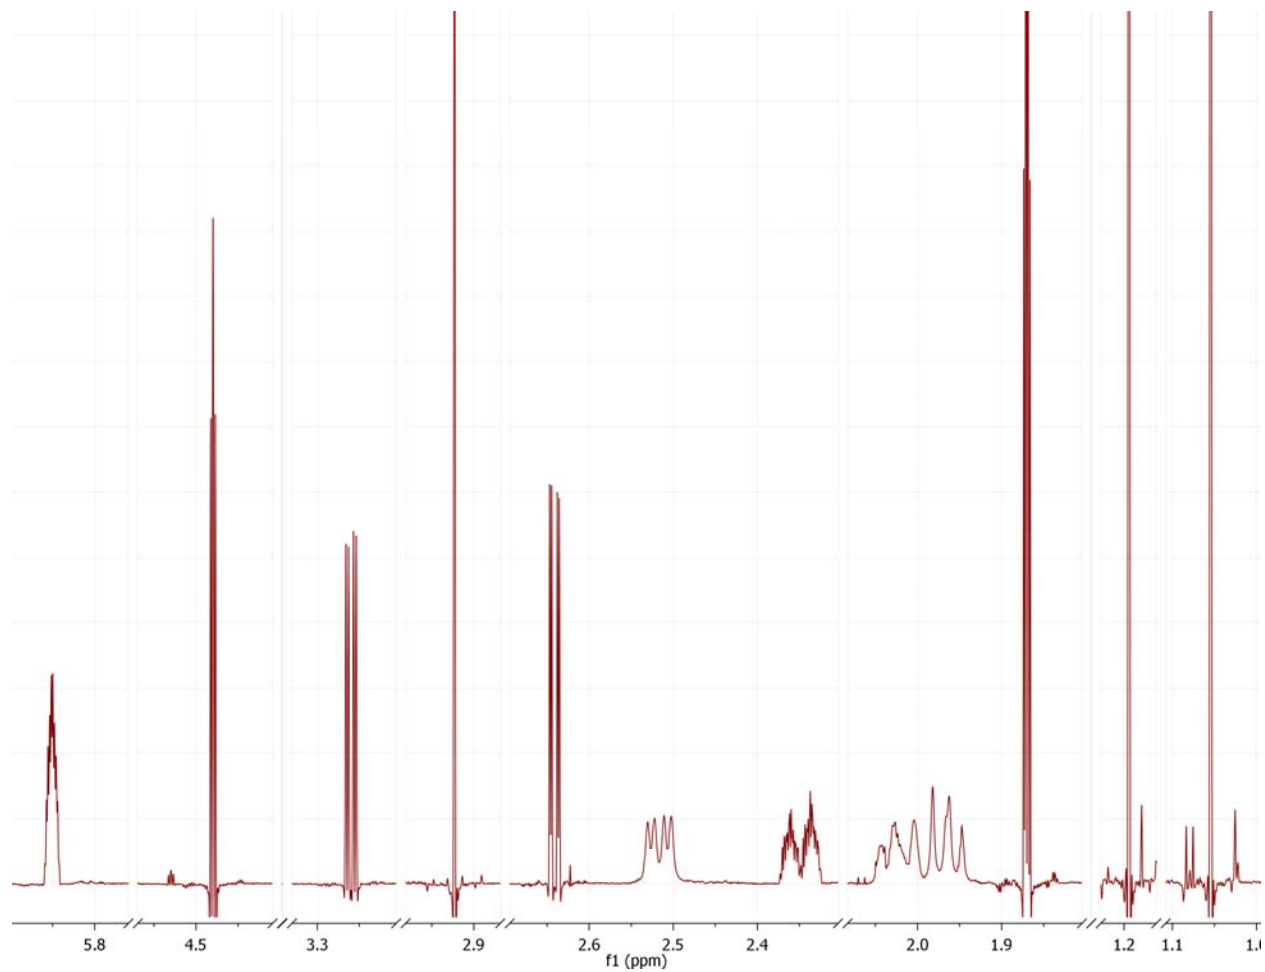

**S3. NMR Data Synthetic Aquatolide Using the Sample from Saya et al. Orgl. Lett. 2015.** 900 MHz spectra:  $^1\text{H}$  NMR (A),  $^{13}\text{C}$  NMR DEPT-135 (B), COSY (C), HSQC (D), and HMBC (E)

**Raw NMR data:**  $^1\text{H}$  NMR FID (400 MHz),  $^1\text{H}$  NMR FID (900 MHz), HiFSA PMS file: included in separate ZIP file.

**A**

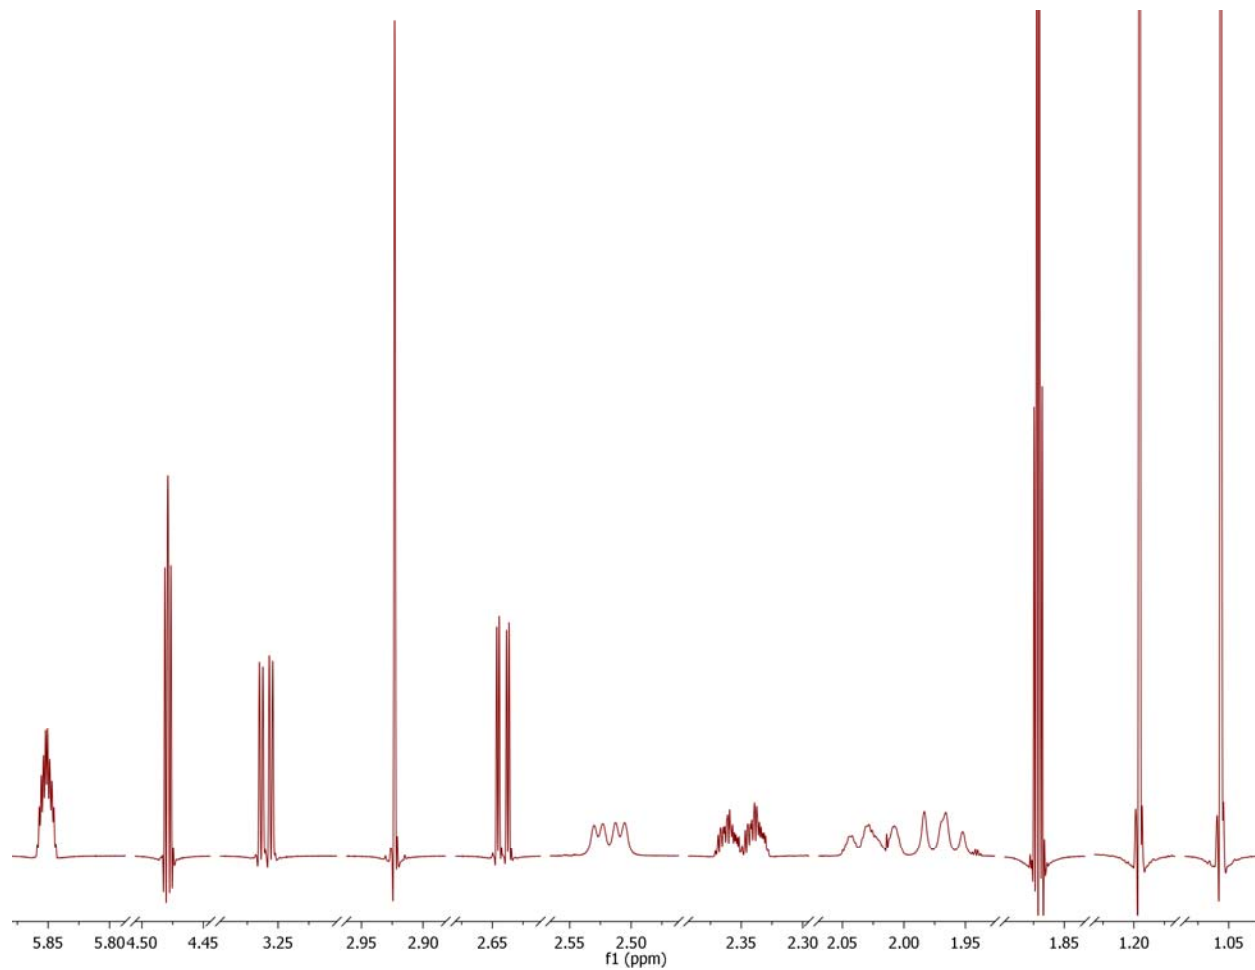

**B**

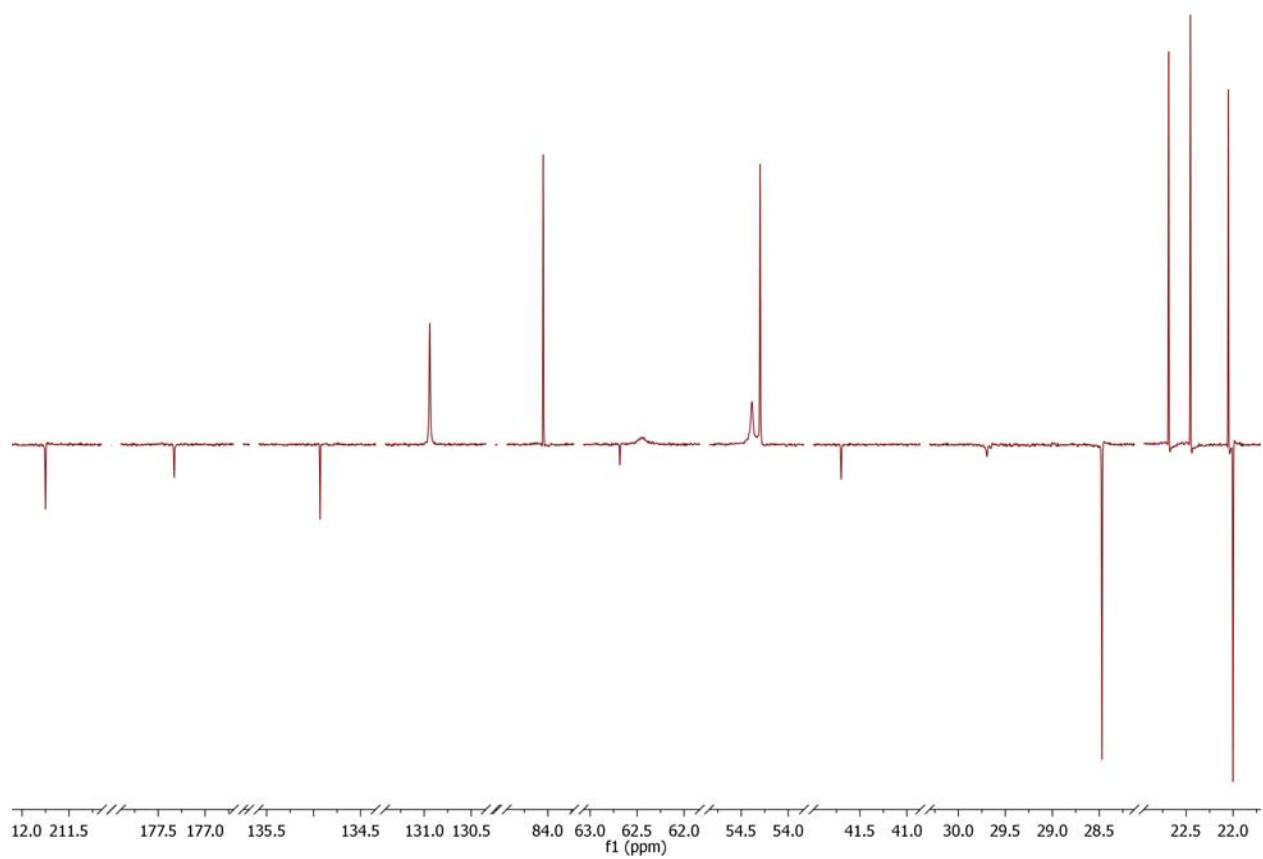

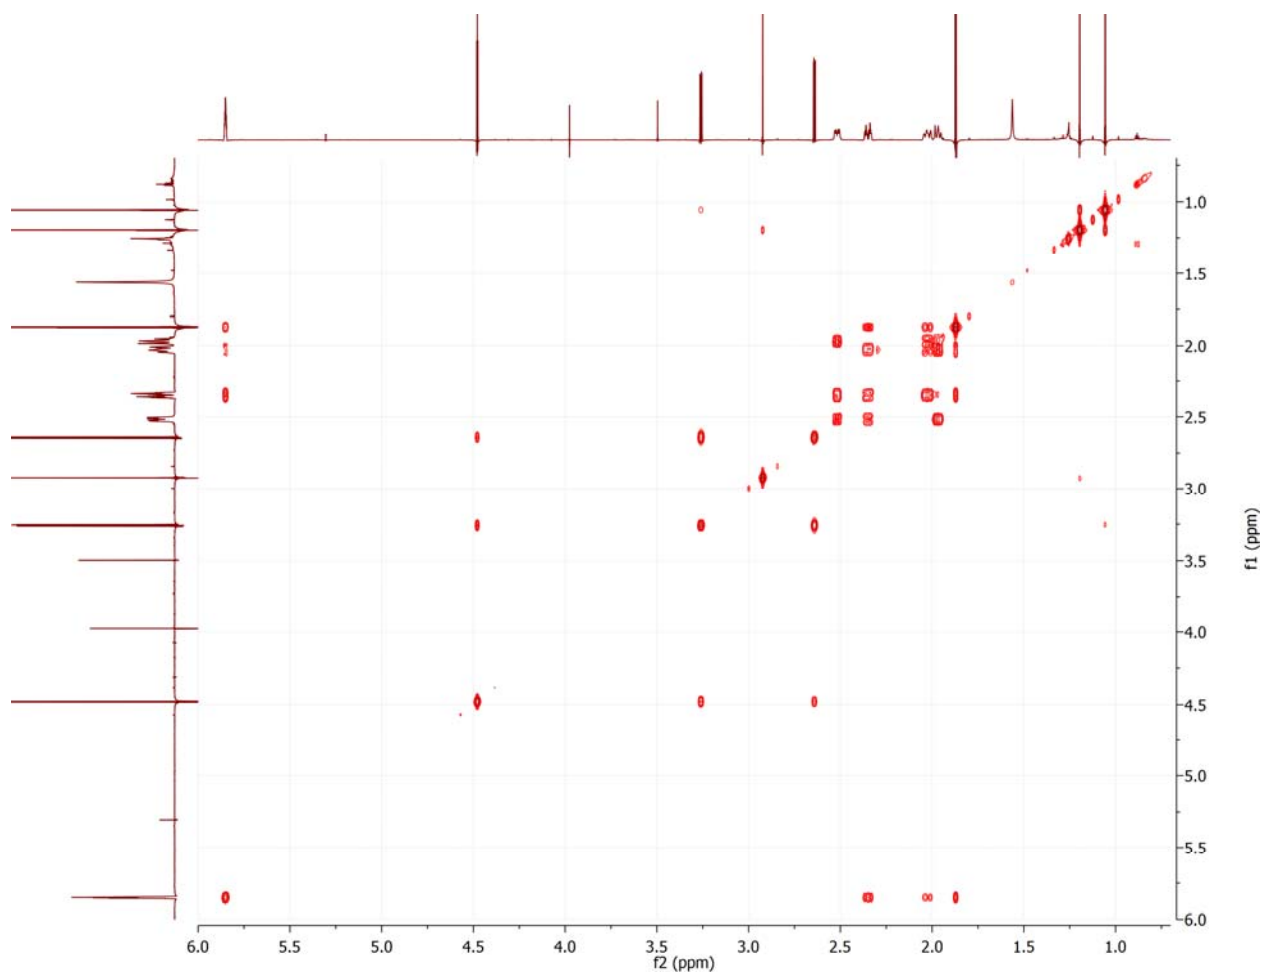

C

**D**

**a**

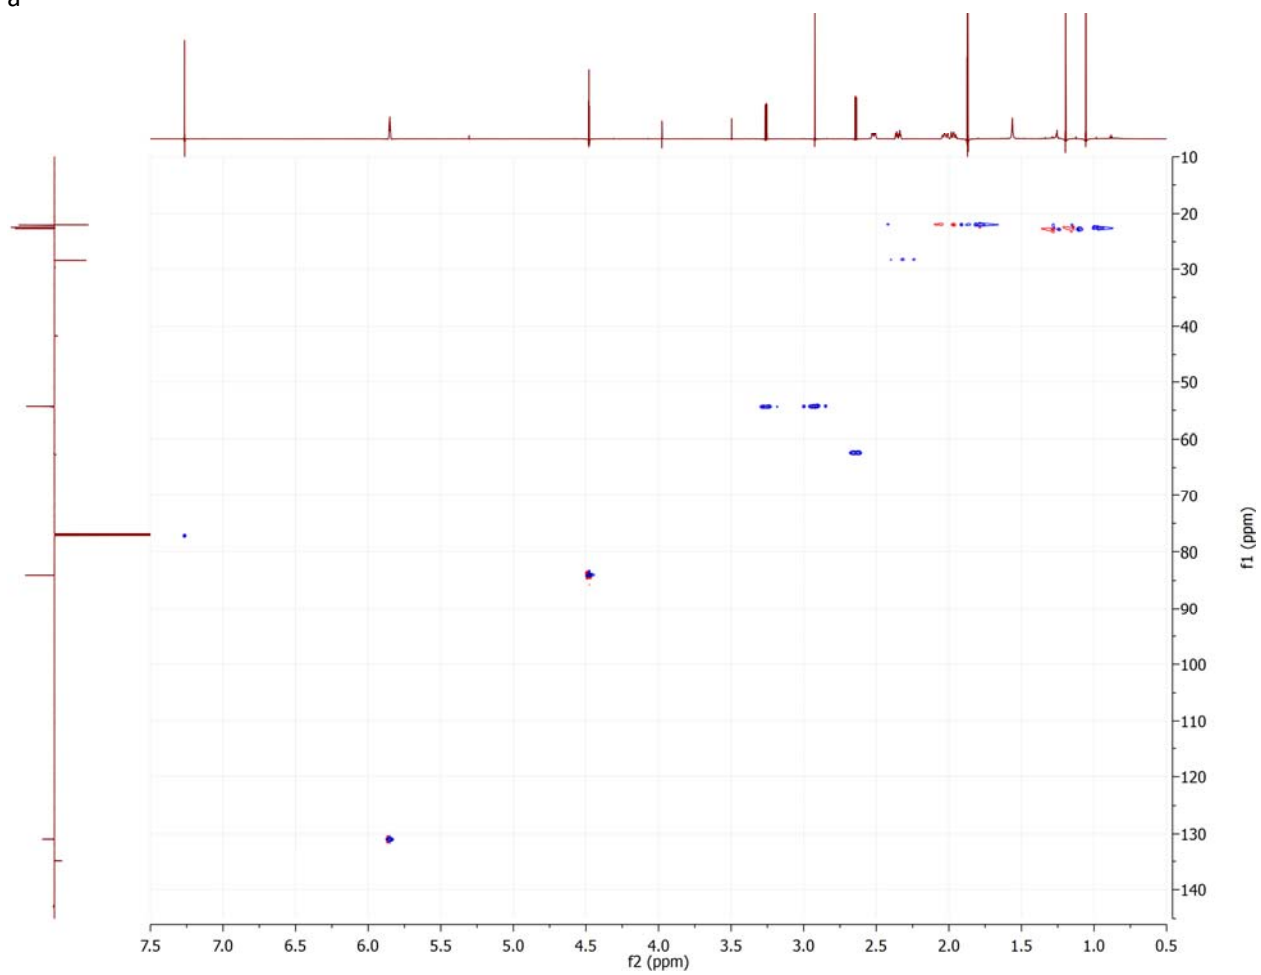



**E**

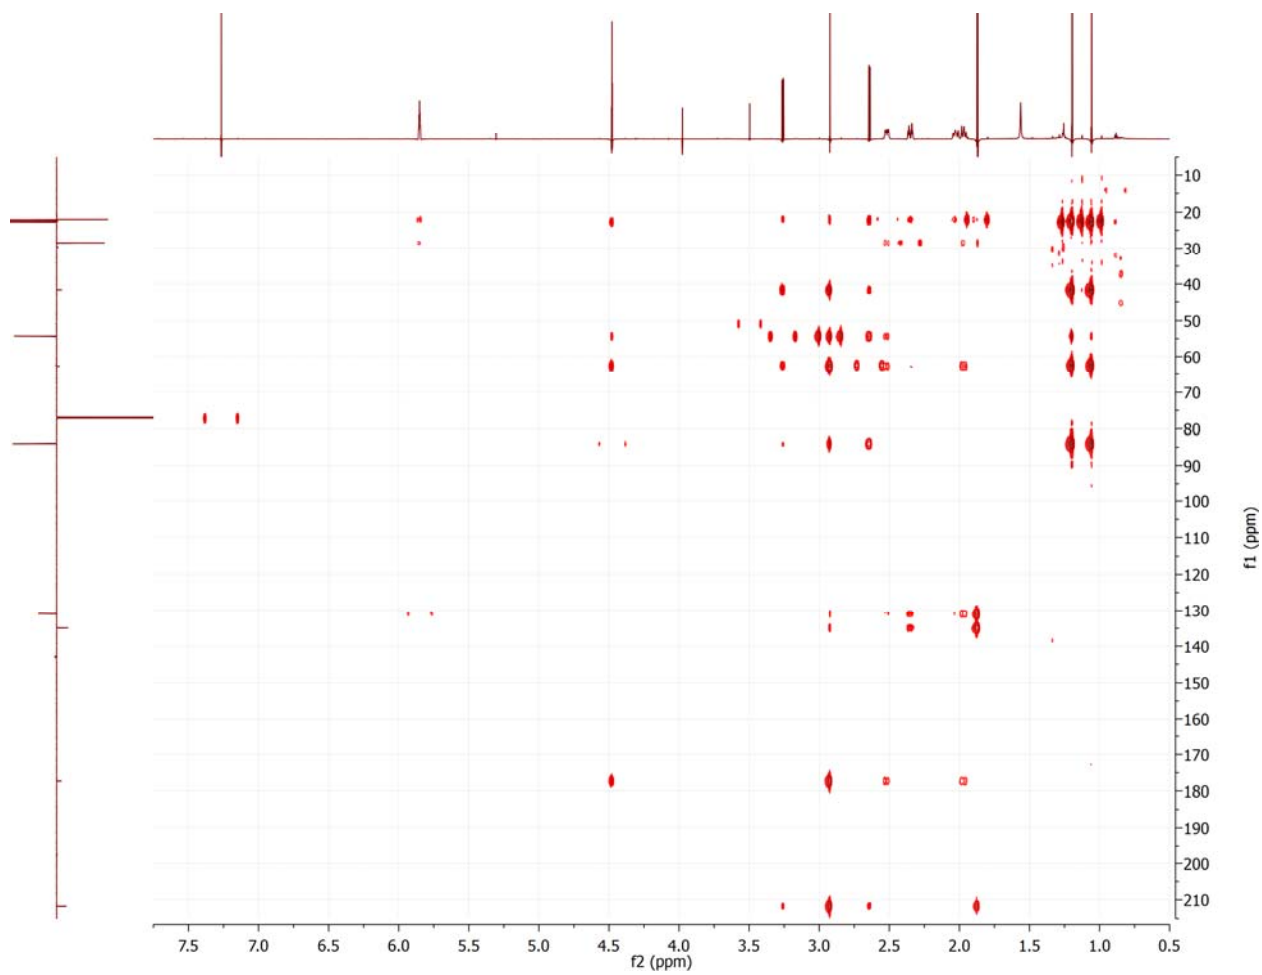

Supplement: jo5b02456_si_002.pdf [file jo5b02456_si_002.pdf]
